# Supplementary material
Source: ML conference proceedings conference paper supplement (https://proceedings.mlr.press/v139/cohen21c.html)
Supplement: Supplementary file 3 [file cohen21c-supp.zip]

Archive with 13 entries (12 files):
- code/
- __MACOSX/._code
- code/MixOfGaussians.py
- code/.DS_Store
- __MACOSX/code/._.DS_Store
- code/kTupleClustering.py
- code/PointsAverage.py
- code/README
- __MACOSX/code/._README
- code/main.py
- __MACOSX/code/._main.py
- full_version.pdf
- __MACOSX/._full_version.pdf
