# Supplementary material
Source: ML conference proceedings conference paper supplement (https://proceedings.mlr.press/v139/cohen21c.html)
Supplement: Supplementary file 3 [file cohen21c-supp.zip › code/README]

run:
python main.py

This code tests our main algorithms PrivatekNoisyCenters and PrivatekAverages for k-tuple clustering.
Specifically, each k-tuple is generated by executing k-means++ over a fresh set of samples from a uniform mixture of k standard d-dimensional Gaussian that are well-separated from each other.
Then, we solve the k-tuple clustering problem by executing one of our algorithms, which results in a new (private) k-tuple.
Finally, we test whether this private k-tuple separates the original samples correctly (i.e., that samples which belong to the same Gaussian are also close to the same point in the tuple). 

The parameters of the test can be specified inside the python script.

We remark that we did not try to improve the running time (e.g., using multiple threads).
Therefore, testing PrivatekAverages takes a large amount of time.
